# 1 Remote effect of Insecticide-treated 2 nets and the personal protection 3 against malaria mosquito bites.

---

4 Moiroux Nicolas<sup>1,2§</sup>, Chandre Fabrice<sup>1</sup>, Hougard Jean-Marc<sup>1</sup>, Corbel Vincent<sup>1</sup>, and Pernetier Cédric<sup>1,3</sup>.

5 <sup>1</sup> MIVEGEC (IRD 224-CNRS 5290-UM1-UM2), Institut de Recherche pour le Développement (IRD),  
6 Montpellier, France.

7 <sup>2</sup> Institut de Recherche en Sciences de la Santé (IRSS), Bobo-Dioulasso, Burkina Faso

8 <sup>3</sup> Institut Pierre Richet (IPR), Bouaké, Côte d'Ivoire

9 <sup>§</sup> Corresponding author

## 10 **Abstract**

11 Experimental huts are part of the WHO process for testing and evaluation of Insecticide Treated Nets  
12 (ITN) in semi-field conditions. Experimental Hut Trials (EHTs) mostly focus on two main indicators (i.e.  
13 mortality and blood feeding reduction) that serve as efficacy criteria to obtain WHO interim  
14 recommendation. However, several other outputs that rely on counts of vectors collected in the huts  
15 are neglected although they can give useful information about vectors' behavior and personal  
16 protection provided by ITNs. In particular, EHTs allow to measure the deterrent effect and personal  
17 protection of ITNs.

18 To provide a better assessment of ITNs efficacy, we performed a retrospective analysis of the  
19 deterrence and the personal protection against malaria transmission for 12 unwashed and 13  
20 washed ITNs evaluated through EHTs conducted in West Africa.

21 A significant deterrent effect was shown for six of the 12 unwashed ITNs tested. When washed 20  
22 times, only three ITNs had significant deterrent effect (Rate Ratios (RR)<1; p<0.05) and three showed

23 an apparent “attractiveness” ( $RR > 1$ ;  $p < 0.01$ ). When compared to the untreated net, all unwashed  
24 ITNs showed lower number of blood-fed *Anopheles* indicating a significant personal protection  
25 ( $RR < 1$ ,  $p < 0.05$ ). However, when washed 20 times, three ITNs that were found to be attractive did not  
26 significantly reduced human-vector contact ( $p > 0.05$ ).

27 Current WHO efficacy criteria do not sufficiently take into account the deterrence effect of ITNs.  
28 Moreover the deterrence variability is rarely discussed in EHT’s reports. Our findings highlighted the  
29 long range effect (deterrent or attractive) of ITNs that may have significant consequences for  
30 personal/community protection against malaria transmission. Indicators measuring the deterrence  
31 should be further considered for the evaluation of ITNs.

## 32 **Background**

33 Between 2000 and 2015, the scale-up of malaria control interventions helped to reduce malaria  
34 mortality by 60% globally, and by 66% in sub-Saharan Africa (SSA). However, malaria is still a major  
35 cause of death with 438 000 deaths (uncertainty range: 236 000 – 635 000) of which 90% occur in  
36 SSA (1). A recent study showed that about 70% of malaria cases were averted since 2000 due to the  
37 deployment of insecticide treated net (ITN) (2) hence underlying the need to achieve wide coverage  
38 of core interventions in all transmission settings. The ownership of ITNs increased from 2% in 2000 to  
39 56% in 2015 but is still far from the universal coverage objective of WHO (1).

40 According to WHO (1), National Malaria Control Programs (NMCPs) and global malaria partners  
41 should only distribute ITNs that have been recommended by the WHO Pesticide Evaluation Scheme  
42 (WHOPES). Sixteen products are currently recommended by WHOPES (3). WHOPES evaluation  
43 scheme is a 3 steps process (1. laboratory - 2. small- and 3. large-scale field studies) undertaken to  
44 determine the efficacy and operational acceptability of ITNs (4). The objectives of laboratory testing  
45 (phase I) are to determine the efficacy and wash-resistance of an ITN and to study the dynamics of  
46 the insecticide on the netting fibre. Candidate ITNs that meet the requirements of phase I testing  
47 should subsequently be tested in phase II studies in experimental huts, where the efficacy of ITNs  
48 against wild free-flying mosquitoes is investigated. Candidate ITNs that reach the efficacy thresholds  
49 of phase I and phase II studies receive an interim recommendation for use as Long Lasting Insecticidal  
50 Nets (LLIN) (limited to four years of duration). To get the full recommendation, the net survivorship  
51 and attrition, fabrics physical integrity and insecticidal efficacy must be monitored and must reach  
52 WHOPES criteria during 3 years under field conditions (phase III large-scale field study) (5).

53 Experimental huts used in phase II studies allow evaluation of ITNs under controlled conditions that  
54 mirror those in which mosquitoes enter a human dwelling and face an ITN in normal use. Results  
55 from Experimental Hut Trials (EHTs) usually focus on two main indicators that are criteria for granting  
56 the WHO interim recommendation: the blood feeding inhibition (BFI, i.e. the reduction in blood-  
57 feeding rates relative to the control) and the mortality rates (proportion of dead mosquitoes).  
58 However, several other outputs that rely on counts of vectors collected in the huts are often  
59 neglected or analyzed with inappropriate statistical methods although they can provide useful  
60 information about vectors' behavior and personal protection provided by ITNs. In particular, EHTs  
61 allow to measure the deterrent effect of ITNs. The deterrence is defined as the reduction in the  
62 number of mosquitoes entering the treated hut relative to the control hut (untreated nets) (4). This  
63 indicator is measured because some insecticides (e.g. the pyrethroids) are expected to repel malaria  
64 vectors at distance preventing their entrance in the dwellings. It is therefore expected that the  
65 deterrence will be null or positive. Although it is true for most of EHTs, negative deterrence values  
66 (i.e. more malaria *Anopheles* were collected in the treated hut than in the control hut) occurred  
67 sometimes. In a recent review studying the impact of pyrethroid resistance in malaria vectors on the  
68 efficacy of ITN (6), the authors provide 55 values of deterrence from 17 articles reporting results of  
69 EHTs. Thirteen (24%) of these values (from 7 articles) were negatives. In this latter review, in the  
70 concerned articles (7–13) and in a recently published study (14), the authors did not discuss much  
71 about the cause or origin of these surprising “attractiveness” of treated huts. This phenomenon may  
72 have significant consequences on the efficacy of ITNs in term of personal protection against malaria  
73 transmission.

74 In EHT, the personal protection is defined as the reduction in the number of blood-fed mosquitoes in  
75 the treatment hut relative to the number of blood-fed mosquitoes in the control hut (4). However,  
76 this outcome that is greatly driven by the deterrent effect of ITNs, is almost totally overlooked with  
77 the current Phase II efficacy indicators analysis process. Indeed, although current guidelines  
78 recommend calculating the personal protection of ITNs, no statistical guidance is provided to state  
79 on its significance. To illustrate the importance of the deterrence on the estimation of the personal  
80 protection of a LLIN product, we address the relationships among the BFI, the deterrence and the  
81 personal protection (see Figure 1): for a given value of BFI, the personal protection provided by an  
82 ITN could be either positive, null, or negative depending on the deterrence (see Supplementary Text  
83 1 for details on the mathematical relationship between the BFI, the deterrence and the personal  
84 protection).

85 Renewed interest for malaria eradication has placed greater emphasis on the development of new  
86 tools to target residual transmission (transmission that escape the control by conventional tools such  
87 as ITNs and IRS) and mosquito behavioral study are now in the spotlight (15–17). The study of the  
88 remote effect (deterrence) and the personal protection confers by ITNs is of great importance as it  
89 might help identify weaknesses of ITNs that should be targeted by complementary vector control  
90 tools.

91 Therefore to provide a better assessment of ITNs used for malaria control, we performed a  
92 retrospective analysis of the deterrence and the personal protection against malaria transmission for  
93 13 ITNs evaluated through EHTs. Trials were conducted in West Africa by Institut de Recherche pour  
94 le Développement (IRD) in the framework of the West African Anopheles, Biology and Control (ABC)  
95 network for testing and evaluation of pesticide products.

96

## 97 **Methods**

### 98 **Studies included in the analysis:**

99 WHOPES supervised EHTs (N=10) involving 13 ITNs (12 long-lasting factory-impregnated nets and one  
100 long-lasting treatment kit (LLT) for manual impregnation) with raw data (daily collections) available  
101 for subsequent statistical analyses were included in the analysis. These studies were carried out  
102 between 2006 and 2011 in two sites (Malanville, Northern Benin and the Kou Valley, Western  
103 Burkina Faso) according to the WHO guidelines (18). A brief description of these trials is presented in  
104 the Table 1 and a summary of the WHOPES phase II experimental hut trial protocol is provided as a  
105 supplementary material (Supplementary Text 2). Among the 13 products tested, all were tested after  
106 20 washes and 12 were tested unwashed (19–24).

107 The malaria vector population in the Malanville site (North of Benin) was composed at 95 % by *An.*  
108 *coluzzii* (former M form) with a Kdr frequency (L1014F target-site mutation) that increased from 16 %  
109 in 2008 to 50 % in 2010 (25). WHO cone bioassays indicated 85% and 93% mortality in 2008 (25) to  
110 the deltamethrin and permethrin insecticides, respectively. In 2010, mortality to deltamethrin  
111 decreased to 40 % (25). In the Kou Valley (North-West of Burkina Faso), the malaria vector  
112 population was composed at 85 % by *An. gambiae* s.s. (former S form) and the Kdr frequency was  
113 90% and the mortality rate induced by deltamethrin was 23 % (8).

## 114 Statistical analysis

115 In order to assess the deterrence, we analyzed the daily numbers of malaria vectors entering the  
116 huts using a negative binomial mixed-effect model with all the treatment arms from the 10 EHTs and  
117 the study site (Malanville or Kou Valley) as fixed effects and with the trial and the day in the trial (to  
118 deal with daily variations of the mosquito density) as nested random effects (random intercepts). The  
119 model was written as follow:

$$\log(\mu_{dt}) = \beta_a^{Arm} + \beta_s^{Site} + a_t + a_{d|t}$$

120 With  $\mu_{dt}$  the number of anopheles entered a particular hut on day  $d$  of trial  $t$ .  $\beta_a^{Arm}$  is the effect on  
121  $\log(\mu_{dt})$  of classification in category  $a$  of the treatment arm and  $\beta_s^{Site}$  the effect of classification in  
122 category  $s$  (Malanville or Kou Valley) of the trial site.  $a_t$  is a random intercept for trial  $t$  and  $a_{d|t}$  the  
123 random intercept for day  $d$  of trial  $t$ .

124 Using the same modelling approach, we assessed the personal protection by analyzing the number of  
125 blood-fed mosquitoes collected daily in the huts. We used the 'R' software (26) and the additional  
126 'glmmADMB' (27) package for the analysis. Rates ratios (RRs) and 95% confidence intervals were  
127 computed.

## 128 Results

129 When compared to the untreated net, the number of *Anopheles* that entered the hut was lower for  
130 six of the 12 unwashed ITNs indicating a significant deterrent effect against malaria vectors (Figure  
131 2A). For the 6 other ITNs, we were not able to detect any difference in the number of mosquito  
132 collected when compared to an UTN. When washed 20 times, only three ITNs (Interceptor,  
133 Permanet 2.0 and Permanet 3.0) had significant deterrent effect (RRs < 1; p<0.05; Figure 2B) and  
134 three others (Icon Maxx LLT, RR= 1.59 [1.15 - 2.19], p=0.0048; Icon Maxx-Net, RR = 1.57 [1.14 - 2.16],  
135 p=0.0059; and OlysetNet, RR= 1.7 [1.18 - 2.47], p=0.0046) showed an apparent "attractiveness". The  
136 7 remaining ITNs did not show any difference with the untreated net (p<0.05).

137 When compared to the untreated net, all unwashed ITNs showed lower number of blood-fed  
138 *Anopheles* indicating a significant personal protection (RR<1, p<0.05, Figure 2C). However when  
139 washed 20 times, the three ITNs that were found to be attractive did not significantly reduced  
140 human-vector contact when compared to an untreated net (p>0.05; Figure 2D).

## 141 Discussion

142 This first analysis of the deterrence effect on personal protection of ITNs in experimental huts  
143 suggests that most, but not all of the WHO LLIN recommended product tested are expected to  
144 provide personal protection against malaria transmission after 20 washes. Due to a negative  
145 deterrence effect, three LN products did not show any significant personal protection against  
146 pyrethroid resistant malaria vectors after 20 consecutive washes. The three LN cause however  
147 greater killing effect on mosquito vectors than untreated nets (20,21,24).

148 Whatever the direction of the mosquito movement in presence of ITNs (deterrence versus  
149 attractiveness), this movement indicates that malaria vectors are able to detect the ITN at distance,  
150 before entering the hut. Deterrence of ITNs has been widely described in the last decades (28,29)  
151 because it allows reducing the vector density inside the dwellings fitted with ITN and therefore  
152 reducing the human-vector contact whether or not under the ITN. However, it is still unknown which  
153 volatiles are detected by mosquitoes. These volatiles could be the insecticide itself, additives,  
154 degradation products of these later, or products of the interaction among the insecticide, additives,  
155 CO<sub>2</sub> and human odors. Despite a low vapor pressure (i.e. a low volatility), pyrethroids have been  
156 found in the air around a treated net (30) at concentrations (0.000021 – 0.000038 mg/m<sup>3</sup>) that are  
157 considered negligible in terms of toxicity for humans (31,32). However, given the extraordinary  
158 sensitivity of the insects' olfactory system (33–35), we can reasonably suspect that such  
159 concentrations might be detected by mosquitoes. This field of investigation (i.e. chemical and  
160 behavioral ecology in a context of widespread vector control tool implementation) has been  
161 neglected for decades and there is a need for more behavioral and physiological studies.

162 In this study, 3 ITNs of 13 that used the permethrin or the lambda-cyhalothrin insecticides were  
163 found to be attractive for malaria vectors in pyrethroid resistance areas after 20 washes. We were  
164 not able to find the same trend with corresponding unwashed ITNs indicating a significant impact of  
165 washing on ITN deterrence. The performances of an ITN can be altered by washing. After 20 washes,  
166 the mortality is strongly reduced whatever the type of ITN (20–24,19) indicating a reduction of the  
167 concentration of available insecticide on the net (36). The attraction of washed ITNs might therefore  
168 indicate an insecticide dose-dependent reversal effect of orientation behavior as it has been  
169 observed for *Anopheles gambiae* with human-derived putative repellents (37) and for *Aedes*  
170 *albopictus* with several carboxylic acids (38,39). Because ITNs are rarely washed 20 times in their  
171 lifetime (40–42), the kinetic of active ingredients on the fiber in relation with behavioral responses of

172 mosquitoes are urgently needed to understand better the effect of consecutive washing on ITNs  
173 deterrence.

174 It should be noted that the untreated (control) net used in trial 8 (Table 1) was a polyester net, a  
175 different fabric and mesh size than the evaluated Olyset Net. To our knowledge, there is no study  
176 that address the role of net fabrics and mesh sizes of nets on human odor and CO<sub>2</sub> dispersion.  
177 However, we cannot exclude that wide mesh ITNs (as Olyset Net (24)) allowed a better dispersion of  
178 human odor and CO<sub>2</sub> than nets having smaller mesh size. The role of mesh size in the dispersion of  
179 odors and volatile substances would merit further investigations.

180 The impact of the physiological resistance to insecticide in the host-seeking behavior has been  
181 overlooked for decades. Recent findings from our team (Porciani et al., under review) showed that a  
182 lab strain of *An. gambiae* homozygous for the *kdr-w* mutation (L1014F) was significantly attracted by  
183 an animal host + permethrin treated net odor plume. Studies are ongoing to investigate the impact  
184 of other mutations and metabolic mechanisms conferring resistance to public health insecticides.  
185 Both the *An. gambiae* populations from Malanville and Kou Valley carried the *kdr-w* mutation (8,25)  
186 among other resistance mechanisms. We suspect that resistance mechanisms might modulate the  
187 host-seeking behavior by leading to the attraction of some *Anopheles* vectors when permethrin  
188 treated ITNs are drastically washed. Studies are ongoing to investigate the impact of other mutations  
189 and metabolic mechanisms on the behavior of mosquitoes in presence of both human host and ITNs.

190 We showed that three ITNs having a significant attractive effect did not provide a better personal  
191 protection than UTNs. In this particular condition, individual benefits of using these ITNs instead of  
192 an UTN (provided the UTN is maintained in good condition and is sufficiently large so that the sleeper  
193 do not make contact with it) would appeared to be null (28,43). However, as shown in Figure 1,  
194 attractiveness would induce null or negative personal protection only for nets exhibiting a BFI rate  
195 lower than 50%.

196 The effect of attraction on community protection cannot be assessed precisely with EHTs data.  
197 Indeed, washed ITNs that we found to be attractive were efficient to kill an important number of  
198 mosquitoes (20,21,24) contributing to the reduction of the adult density and the lifespan of the local  
199 population of vectors. However theoretically (44), the community protection provided by an intra-  
200 domiciliary vector control tool is highly dependent on the coverage of the intervention (i.e. the  
201 proportion of people that use it) that cannot be simulated in EHTs. It is therefore impossible to

202 conclude that the attractive property might have an effect (either positive or negative) on the  
203 community protection based on EHT outputs.

204 The best way to evaluate the community effect of ITNs against transmission should be to monitor  
205 and compare EIRs, malaria prevalence and incidence through a phase III Randomized Control Trial  
206 (RCT) with a negative control arm (untreated net). Nevertheless, since ITNs are now the baseline  
207 intervention for most of NMCP, the use of untreated nets as a negative control raises ethical issues.  
208 Alternatively, as compliance with ITNs is never 100%, a parasitological and clinical follow-up of non-  
209 users after the distribution of LLIN should help to measure the community effect. Community level  
210 trials are costly and time consuming and therefore the use of mathematical models of transmission  
211 using EHT data showed useful to predict community protection induced by LLIN. Such models exists  
212 and have been used to compare the potential efficacy of insecticide products having or not a  
213 repellent effect (45). The authors of the later study found that purely toxic products with no  
214 deterrence are predicted to generally provide superior protection to non-users and even users, even  
215 if that product confers no personal protection. By extrapolation of Killeen and colleagues' results  
216 (45), we could expect that attractive products might induce superior community protection than  
217 deterrent ones. However, according to Okumu *et al.* (46) who adapted this model to be used with  
218 EHT data, the model do not allow to deal with negative deterrence. Therefore, as a first step before  
219 community-level trials, simulations using mathematical models of transmission adapted to allow for  
220 attractive product should be run to evaluate the effect of an attractive ITN at the community level. If  
221 the community effect might be confirmed, it is important to note that products which confer low or  
222 no personal protection will require adapted awareness campaign that emphasize the communal  
223 nature of protection (45).

## 224 **Conclusion:**

225 Current WHO efficacy criteria do not take into account the deterrence and the deterrence variability  
226 is neither analyzed nor discussed in the majority of the reports of experimental hut studies as  
227 illustrated in a recent literature review (6). Consequently, there is an important gap of knowledge  
228 with unknown consequences in terms of public health. Our study points the long range effect  
229 (repellent or attractive) of ITNs, the personal protection and above all, the community protection out  
230 to be major criteria for the evaluation of ITNs.



## 231 **Acknowledgements**

232 **These Phase II trials and the present study have been run in the frame of ABC network.**

## 233 **Competing interests**

234 Authors declare they have no competing interests.

## 235 **List of Tables and Figures:**

236 **Table 1: Summary of the experimental hut trials included in the analysis**

237 **Figure 1: Relationships among the blood-feeding inhibition (BFI), the deterrence and the personal**  
238 **protection as measured in experimental hut trials.** See supplementary Text 1 for details on the  
239 mathematical relationship among BFI, deterrence and personal protection. Values of BFI and  
240 deterrence from studies cited in the review by Strode *et al.* (6) have been plotted when both  
241 indicators can be extracted from Figure 2 and Table 12 of this review article.

242 **Figure 2: Deterrence (A,B) and personal protection (C,D) of unwashed (A,C) and washed (B,D)**  
243 **insecticidal treated nets evaluated through experimental hut trials in West Africa.** Squares indicate  
244 Rate Ratios (with the control untreated net as reference) as obtained with Negative Binomial mixed  
245 effect models of daily counts of *Anopheles* entered the huts (A,B) and counts of blood-fed *Anopheles*  
246 (C,D). Error bars represent 95% confidence intervals of the rate ratios. LL: Long Lasting treatment for  
247 manual impregnation of the net.

## 248 **Supplementary materials:**

249 **Supplementary Text 1: Calculation of the deterrence (D), the blood-feeding inhibition (BFI), and the**  
250 **personal protection (PP).**

251 **Supplementary Text 2: Summary of the WHOPES Experimental Hut Trial protocol.**

252

## 253 **References**

- 254 1. World Health Organization. World malaria report 2015 [Internet]. Geneva: World Health  
255 Organization; 2015 [cited 2016 Sep 6] p. 243. Available from:  
256 <http://www.who.int/iris/handle/10665/200018>
- 257 2. Bhatt S, Weiss DJ, Cameron E, Bisanzio D, Mappin B, Dalrymple U, et al. The effect of malaria  
258 control on *Plasmodium falciparum* in Africa between 2000 and 2015. *Nature*. 2015 Sep 16;  
259 doi:10.1038/nature15535
- 260 3. World Health Organization. WHO recommended long-lasting insecticidal nets [Internet]. 2016  
261 [cited 2016 Sep 8]. Available from: [http://www.who.int/whopes/Long-](http://www.who.int/whopes/Long-lasting_insecticidal_nets_April_2016.pdf)  
262 [lasting\\_insecticidal\\_nets\\_April\\_2016.pdf](http://www.who.int/whopes/Long-lasting_insecticidal_nets_April_2016.pdf)
- 263 4. WHO. Guidelines for laboratory and field-testing of long-lasting insecticidal nets. World Health  
264 Organization; 2013 p. 89. Report No.: WHO/HTM/NTD/WHOPES/2013.3.
- 265 5. WHO. Guidelines for monitoring the durability of long-lasting insecticidal mosquito nets under  
266 operational conditions. World Health Organization; 2011. Report No.:  
267 WHO/HTM/NTD/WHOPES/2011.5.
- 268 6. Strode C, Donegan S, Garner P, Enayati AA, Hemingway J. The Impact of Pyrethroid Resistance  
269 on the Efficacy of Insecticide-Treated Bed Nets against African Anopheline Mosquitoes:  
270 Systematic Review and Meta-Analysis. *PLoS Med*. 2014 Mar;11(3):e1001619.  
271 doi:10.1371/journal.pmed.1001619
- 272 7. Chandre F, Darriet F, Duchon S, Finot L, Manguin S, Carnevale P, et al. Modifications of  
273 pyrethroid effects associated with *kdr* mutation in *Anopheles gambiae*. *Med Vet Entomol*.  
274 2000;14(1):81–8.
- 275 8. Corbel V, Chabi J, Dabire RK, Etang J, Nwane P, Pigeon O, et al. Field efficacy of a new mosaic  
276 long-lasting mosquito net (PermaNet 3.0) against pyrethroid-resistant malaria vectors: a multi  
277 centre study in Western and Central Africa. *Malar J*. 2010;9:113. doi:10.1186/1475-2875-9-113
- 278 9. Fanello C, Kolaczinski JH, Conway DJ, Carnevale P, Curtis CF. The *kdr* pyrethroid resistance gene  
279 in *Anopheles gambiae*: tests of non-pyrethroid insecticides and a new detection method for the  
280 gene. *Parassitologia*. 1999 Sep;41(1–3):323–6.
- 281 10. Okumu FO, Mbeyela E, Lingamba G, Moore J, Ntamatungiro AJ, Kavishe DR, et al. Comparative  
282 field evaluation of combinations of long-lasting insecticide treated nets and indoor residual  
283 spraying, relative to either method alone, for malaria prevention in an area where the main  
284 vector is *Anopheles arabiensis*. *Parasit Vectors*. 2013;6:46. doi:10.1186/1756-3305-6-46
- 285 11. Ngufor C, N'Guessan R, Boko P, Odjo A, Vigninou E, Asidi A, et al. Combining indoor residual  
286 spraying with chlorfenapyr and long-lasting insecticidal bed nets for improved control of  
287 pyrethroid-resistant *Anopheles gambiae*: an experimental hut trial in Benin. *Malar J*.  
288 2011;10:343. doi:10.1186/1475-2875-10-343

- 289 12. Malima RC, Oxborough RM, Tungu PK, Maxwell C, Lyimo I, Mwingira V, et al. Behavioural and  
290 insecticidal effects of organophosphate-, carbamate- and pyrethroid-treated mosquito nets  
291 against African malaria vectors. *Med Vet Entomol*. 2009 Dec;23(4):317–25. doi:10.1111/j.1365-  
292 2915.2009.00837.x
- 293 13. Malima RC, Magesa SM, Tungu PK, Mwingira V, Magogo FS, Sudi W, et al. An experimental hut  
294 evaluation of Olyset nets against anopheline mosquitoes after seven years use in Tanzanian  
295 villages. *Malar J*. 2008;7:38. doi:10.1186/1475-2875-7-38
- 296 14. Ngufor C, N'Guessan R, Fagbohoun J, Todjinou D, Odjo A, Malone D, et al. Efficacy of the Olyset  
297 Duo net against insecticide-resistant mosquito vectors of malaria. *Sci Transl Med*. 2016 Sep  
298 14;8(356):356ra121. doi:10.1126/scitranslmed.aad3270
- 299 15. WHO. Guidance note on the control of residual malaria parasite transmission [Internet]. 2014.  
300 Report No.: WHO/HTM/GMP/MPAC/2014.5. Available from:  
301 [http://www.who.int/entity/malaria/publications/atoz/technical-note-control-of-residual-](http://www.who.int/entity/malaria/publications/atoz/technical-note-control-of-residual-malaria-parasite-transmission-sep14.pdf)  
302 [malaria-parasite-transmission-sep14.pdf](http://www.who.int/entity/malaria/publications/atoz/technical-note-control-of-residual-malaria-parasite-transmission-sep14.pdf)
- 303 16. Durnez L, Coosemans M. Residual Transmission of Malaria: An Old Issue for New Approaches.  
304 In: Manguin S, editor. *Anopheles mosquitoes - New insights into malaria vectors* [Internet].  
305 InTech; 2013 [cited 2015 Aug 4]. Available from:  
306 [http://www.intechopen.com/books/anopheles-mosquitoes-new-insights-into-malaria-](http://www.intechopen.com/books/anopheles-mosquitoes-new-insights-into-malaria-vectors/residual-transmission-of-malaria-an-old-issue-for-new-approaches)  
307 [vectors/residual-transmission-of-malaria-an-old-issue-for-new-approaches](http://www.intechopen.com/books/anopheles-mosquitoes-new-insights-into-malaria-vectors/residual-transmission-of-malaria-an-old-issue-for-new-approaches)
- 308 17. Killeen GF. Characterizing, controlling and eliminating residual malaria transmission. *Malar J*.  
309 2014;13(1):330. doi:10.1186/1475-2875-13-330
- 310 18. WHO. Guidelines for laboratory and field-testing of long-lasting insecticidal mosquito nets.  
311 2005. Report No.: WHO/CDS/WHOPES/GCDPP/2005.11.
- 312 19. WHO Pesticide Evaluation Scheme. Report of the tenth WHOPES working group meeting  
313 [Internet]. Geneva: World Health Organization; 2007 [cited 2016 Aug 19]. Available from:  
314 <http://www.who.int/iris/handle/10665/69465>
- 315 20. WHO Pesticide Evaluation Scheme. Report of the eleventh WHOPES working group meeting  
316 [Internet]. Geneva: World Health Organization; 2008 [cited 2016 Aug 19]. Report No.:  
317 WHO/HTM/NTD/WHOPES/2008.1. Available from:  
318 <http://www.who.int/iris/handle/10665/69732>
- 319 21. WHO Pesticide Evaluation Scheme. Report of the twelfth WHOPES working group meeting  
320 [Internet]. Geneva: World Health Organization; 2009 [cited 2016 Aug 19]. Available from:  
321 <http://www.who.int/iris/handle/10665/69986>
- 322 22. WHO Pesticide Evaluation Scheme. Report of the thirteenth [13th] WHOPES working group  
323 meeting [Internet]. Geneva: World Health Organization; 2009 [cited 2016 Aug 19]. Available  
324 from: <http://www.who.int/iris/handle/10665/44212>
- 325 23. WHO Pesticide Evaluation Scheme. Report of the fourteenth [14th] WHOPES working group  
326 meeting [Internet]. Geneva: World Health Organization; 2011 [cited 2016 Aug 19]. Report No.:

- 327 WHO/HTM/NTD/WHOPES/2011.7. Available from:  
328 <http://www.who.int/iris/handle/10665/44669>
- 329 24. WHO Pesticide Evaluation Scheme. Report of the fifteenth WHOPES working group meeting  
330 [Internet]. Geneva: World Health Organization; 2012 [cited 2016 Aug 19]. Available from:  
331 <http://www.who.int/iris/handle/10665/75304>
- 332 25. Djegbe I, Boussari O, Sidick A, Martin T, Ranson H, Chandre F, et al. Dynamics of insecticide  
333 resistance in malaria vectors in Benin: first evidence of the presence of L1014S kdr mutation in  
334 *Anopheles gambiae* from West Africa. *Malar J.* 2011;10(1):261.
- 335 26. R Development Core Team. R: A Language and Environment for Statistical Computing  
336 [Internet]. Vienna, Austria: R Foundation for Statistical Computing; 2010. Available from:  
337 <http://www.R-project.org>
- 338 27. Skaug H, Fournier D, Nielsen A, Magnusson A, Bolker B. glmmADMB: Generalized Linear Mixed  
339 Models Using AD Model Builder [Internet]. 2012. Available from: [http://R-Forge.R-](http://R-Forge.R-project.org/projects/glmmadmb/)  
340 [project.org/projects/glmmadmb/](http://R-Forge.R-project.org/projects/glmmadmb/)
- 341 28. Takken W. Do insecticide-treated bednets have an effect on malaria vectors? *Trop Med Int*  
342 *Health.* 2002;7(12):1022–30. doi:10.1046/j.1365-3156.2002.00983.x
- 343 29. Lindsay SW, Adiamah JH, Miller JE, Armstrong JR. Pyrethroid-treated bednet effects on  
344 mosquitoes of the *Anopheles gambiae* complex in The Gambia. *Med Vet Entomol.* 1991  
345 Oct;5(4):477–83.
- 346 30. Bomann W. How safe are pyrethroid-treated mosquito nets? An evaluation based on the  
347 example of Solfac EW 050. *Public Health.* 1995;12:30–5.
- 348 31. Barlow SM, Sullivan FM, Lines J. Risk assessment of the use of deltamethrin on bednets for the  
349 prevention of malaria. *Food Chem Toxicol.* 2001 mai;39(5):407–22. doi:10.1016/S0278-  
350 6915(00)00152-6
- 351 32. World Health Organization. A generic risk assessment model for insecticide-treated nets:  
352 revised edition. 2012 [cited 2016 Aug 19]; Available from:  
353 <http://www.who.int/iris/handle/10665/44862>
- 354 33. Angioy AM, Desogus A, Barbarossa IT, Anderson P, Hansson BS. Extreme Sensitivity in an  
355 Olfactory System. *Chem Senses.* 2003 May 1;28(4):279–84. doi:10.1093/chemse/28.4.279
- 356 34. Baker TC, Roelofs WL. Initiation and Termination of Oriental Fruit Moth Male Response to  
357 Pheromone Concentrations in the Field. *Environ Entomol.* 1981 avril;10(2):211.  
358 doi:10.1093/ee/10.2.211
- 359 35. Clements AN. *The Biology of Mosquitoes. Volume 2: Sensory, Reception, and Behaviour.* First  
360 edition. Wallingford u.a.: CABI; 1999. 752 p.
- 361 36. Pennetier C, Bouraima A, Chandre F, Piameu M, Etang J, Rossignol M, et al. Efficacy of Olyset®  
362 Plus, a New Long-Lasting Insecticidal Net Incorporating Permethrin and Piperonyl-Butoxide  
363 against Multi-Resistant Malaria Vectors. *PloS One.* 2013;8(10):e75134.

- 364 37. Logan JG, Stanczyk NM, Hassanali A, Kemei J, Santana AE, Ribeiro KA, et al. Arm-in-cage testing  
365 of natural human-derived mosquito repellents. *Malar J.* 2010;9:239. doi:10.1186/1475-2875-9-  
366 239
- 367 38. Guha L, Seenivasagan T, Iqbal ST, Agrawal OP, Parashar BD. Behavioral and electrophysiological  
368 responses of *Aedes albopictus* to certain acids and alcohols present in human skin emanations.  
369 *Parasitol Res.* 2014 Jul 23;113(10):3781–7. doi:10.1007/s00436-014-4044-0
- 370 39. Seenivasagan T, Guha L, Parashar BD, Agrawal OP, Sukumaran D. Olfaction in Asian tiger  
371 mosquito *Aedes albopictus*: flight orientation response to certain saturated carboxylic acids in  
372 human skin emanations. *Parasitol Res.* 2014 Mar 12;113(5):1927–32. doi:10.1007/s00436-014-  
373 3840-x
- 374 40. Mutuku FM, Khambira M, Bisanzio D, Mungai P, Mwanjo I, Muchiri EM, et al. Physical condition  
375 and maintenance of mosquito bed nets in Kwale County, coastal Kenya. *Malar J.* 2013;12(1):46.  
376 doi:10.1186/1475-2875-12-46
- 377 41. Erlanger TE, Enayati AA, Hemingway J, Mshinda H, Tami A, Lengeler C. Field issues related to  
378 effectiveness of insecticide-treated nets in Tanzania. *Med Vet Entomol.* 2004 Jun;18(2):153–60.  
379 doi:10.1111/j.0269-283X.2004.00491.x
- 380 42. Lindblade KA, Dotson E, Hawley WA, Bayoh N, Williamson J, Mount D, et al. Evaluation of long-  
381 lasting insecticidal nets after 2 years of household use. *Trop Med Int Health.* 2005  
382 Nov;10(11):1141–50. doi:10.1111/j.1365-3156.2005.01501.x
- 383 43. Guyatt HL, Snow RW. The cost of not treating bednets. *Trends Parasitol.* 2002 Jan;18(1):12–6.
- 384 44. Killeen GF, Smith TA, Ferguson HM, Mshinda H, Abdulla S, Lengeler C, et al. Preventing  
385 childhood malaria in Africa by protecting adults from mosquitoes with insecticide-treated nets.  
386 *PLoS Med.* 2007 Jul;4(7):e229. doi:10.1371/journal.pmed.0040229
- 387 45. Killeen GF, Chitnis N, Moore SJ, Okumu FO. Target product profile choices for intra-domiciliary  
388 malaria vector control pesticide products: repel or kill? *Malar J.* 2011;10:207.  
389 doi:10.1186/1475-2875-10-207
- 390 46. Okumu FO, Kiware SS, Moore SJ, Killeen GF. Mathematical evaluation of community level  
391 impact of combining bed nets and indoor residual spraying upon malaria transmission in areas  
392 where the main vectors are *Anopheles arabiensis* mosquitoes. *Parasit Vectors.* 2013;6:17.  
393 doi:10.1186/1756-3305-6-17

394

**Table 1: Summary of the experimental hut trials included in the analysis**

| WHOPES phase II trials |                               |            |      |                  |                 | ITNs tested during the trials (0 and 20 washes) |                          |                          |                    |                            |                       |                                              | Other arms of the trial (except the control untreated net)*                                                                                                                                    | Control untreated net                                          |
|------------------------|-------------------------------|------------|------|------------------|-----------------|-------------------------------------------------|--------------------------|--------------------------|--------------------|----------------------------|-----------------------|----------------------------------------------|------------------------------------------------------------------------------------------------------------------------------------------------------------------------------------------------|----------------------------------------------------------------|
| Trial No.              | Product evaluated             | Site       | Year | WHOPES reference | Duration (days) | Name                                            | Type of ITN <sup>%</sup> | Fabric                   | Insecticide        | Conc. (mg/m <sup>2</sup> ) | Impregnation method   | 2016 WHO recommendation                      |                                                                                                                                                                                                |                                                                |
| 1                      | DawaPlus 1.0                  | Malanville | 2006 | (20)             | 60              | DawaPlus 1.0                                    | LN                       | polyester \$             | Deltamethrin       | 40                         | coated                | no (failed in phase II)                      | CTN 75 den 25 mg/m <sup>2</sup> (0, 20 and until exh. washes), CTN 100 den (40 mg/m <sup>2</sup> 20 washes and 25 mg/m <sup>2</sup> washed until exh.), DawaPlus 1.0 100 den (0 and 20 washes) | untreated polyester net                                        |
| 2                      | DawaPlus 2.0                  | Malanville | 2008 | (22)             | 72              | DawaPlus 1.0 #                                  | LN                       |                          |                    | see above                  |                       |                                              | CTN 25 mg/m <sup>2</sup> (0 and until exh. washes)                                                                                                                                             | untreated polyester net                                        |
|                        |                               |            |      |                  |                 | DawaPlus 2.0                                    | LN                       | polyester \$             | Deltamethrin       | 80                         | coated                | Interim                                      |                                                                                                                                                                                                |                                                                |
| 3                      | DuraNet                       | Kou Valley | 2007 | (20)             | 25              | DuraNet                                         | LN                       | polyethylene             | Alpha-cypermethrin | 261                        | incorporated          | Full                                         | CTN 40 mg/m <sup>2</sup> (0 and until exh. washes)                                                                                                                                             | untreated net (same fabric and mesh size as DuraNet)           |
| 4                      | Icon Maxx and Icon Maxx-Net   | Kou Valley | 2007 | (20,21)          | 35              | Icon Maxx                                       | LLT                      | polyester                | Lambda-cyhalothrin | 50                         | manual treatment kit  | Full                                         | CTN 15 mg/m <sup>2</sup> (0 and until exh. washes)                                                                                                                                             | untreated polyester net                                        |
|                        |                               |            |      |                  |                 | Icon Maxx-Net                                   | LN                       | polyester                | Lambda-cyhalothrin | 50                         | coated                | no (failed in phase II)                      |                                                                                                                                                                                                |                                                                |
| 5                      | Interceptor                   | Malanville | 2006 | (19)             | 66              | Interceptor                                     | LN                       | polyester                | Alpha-cypermethrin | 200                        | coated                | Full                                         | CTN 40 mg/m <sup>2</sup> (0 washes), CTN 200 mg/m <sup>2</sup> (20 and until exh. washes)                                                                                                      | untreated net (same fabric and mesh size as Interceptor )      |
| 6                      | Lifenet                       | Malaville  | 2011 | (23)             | 72              | Lifenet                                         | LN                       | polypropylene            | Deltamethrin       | 340                        | incorporated          | Interim                                      | CTN 25 mg/m <sup>2</sup> (20 and until exh. washes), LifeNet washed 30 times                                                                                                                   | untreated polypropylene net.                                   |
| 7                      | NetProtect                    | Kou Valley | 2007 | (20)             | 25              | NetProtect                                      | LN                       | polyethylene             | Deltamethrin       | 63                         | incorporated          | no (interim until 2013, failed in phase III) | CTN 25 mg/m <sup>2</sup> (0 and until exh. washes)                                                                                                                                             | untreated net (polyethylene)                                   |
| 8                      | Olyset Plus                   | Malanville | 2011 | (24)             | 72              | Olyset Net                                      | LN                       | polyethylene             | Permethrin         | 1000                       | incorporated          | Full                                         | CTN 25 mg/m <sup>2</sup> washed until exh.                                                                                                                                                     | untreated polyester net                                        |
|                        |                               |            |      |                  |                 | Olyset Plus                                     | LN                       | polyethylene             | Permethrin + PBO   | 800                        | incorporated          | Interim                                      |                                                                                                                                                                                                |                                                                |
| 9                      | Permanet 2.5 and Permanet 3.0 | Malanville | 2008 | (21)             | 72              | Permanet 2.0                                    | LN                       | polyester                | Deltamethrin       | 55                         | coated                | Full                                         | CTN 25 mg/m <sup>2</sup> washed until exh.                                                                                                                                                     | Untreated net (same fabric and same design as of Permanet 3.0) |
|                        |                               |            |      |                  |                 | Permanet 2.5 #                                  | LN                       | polyester                | Deltamethrin       | 115                        | coated                | no (interim until 2013)                      |                                                                                                                                                                                                |                                                                |
|                        |                               |            |      |                  |                 | Permanet 3.0                                    | LN                       | polyester + polyethylene | Deltamethrin + PBO | 115                        | incorporated + coated | Interim                                      |                                                                                                                                                                                                |                                                                |
| 10                     | Permanet 3.0                  | Kou Valley | 2008 | (21)             | 36              | Permanet 2.0                                    |                          |                          | see above          |                            |                       | CTN 25 mg/m <sup>2</sup> washed until exh.   | Untreated net (same fabric and same design as of Permanet 3.0)                                                                                                                                 |                                                                |
|                        |                               |            |      |                  |                 | Permanet 3.0                                    |                          |                          | see above          |                            |                       |                                              |                                                                                                                                                                                                |                                                                |

<sup>%</sup> LN: Long-Lasting insecticidal net; LLT: "dip-it-yourself" treatment kit for converting mosquito nets into long-lasting insecticide-treated nets.

\$ linear mass density of 75 denier, the product exists in a 100 denier version

# the product was tested only when washed 20 times

\* CTN: conventionally treated net, treated with the same insecticide than the evaluated product (concentration expressed in mg/m<sup>2</sup>); den = denier; exh: exhaustion;

bioRxiv preprint doi: <https://doi.org/10.1101/073718>; this version posted September 22, 2016. The copyright holder for this preprint (which was not certified by peer review) is the author/funder. All rights reserved. No reuse allowed without permission.

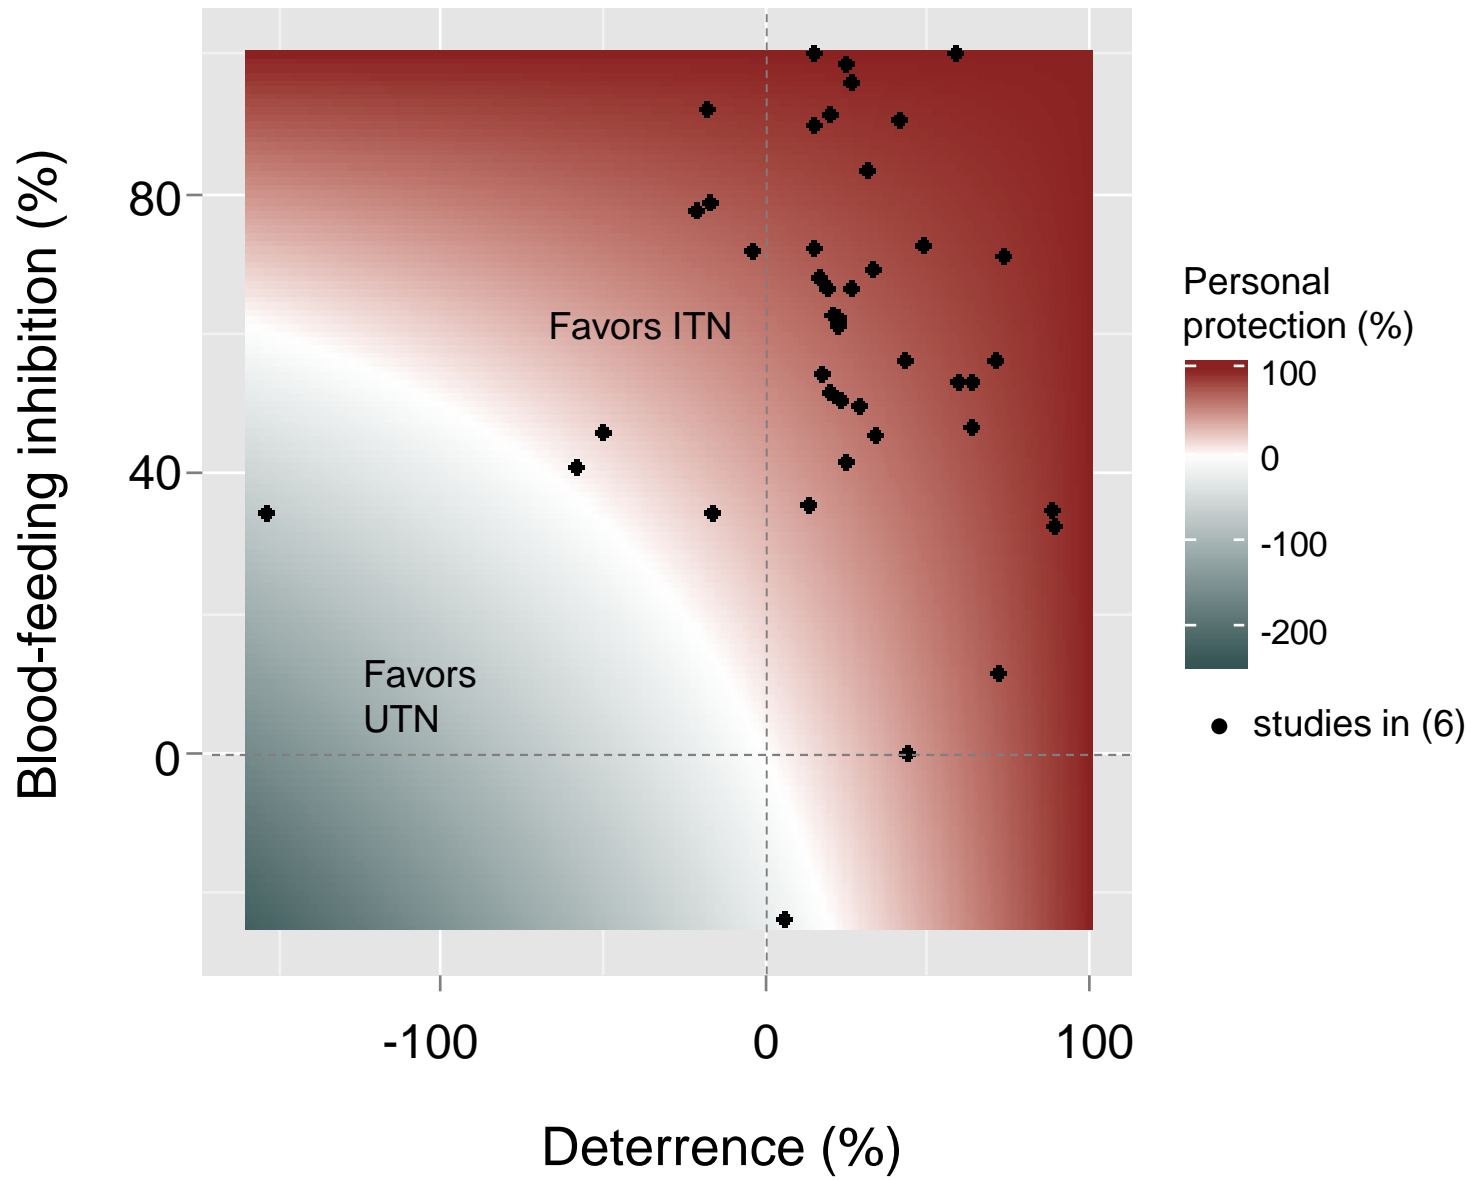

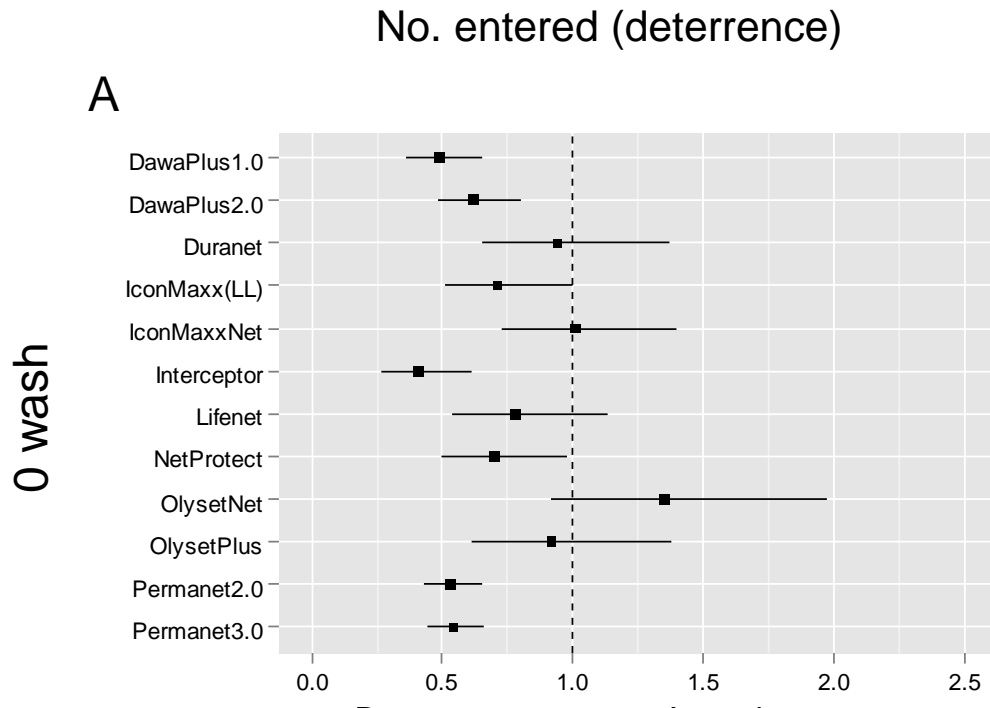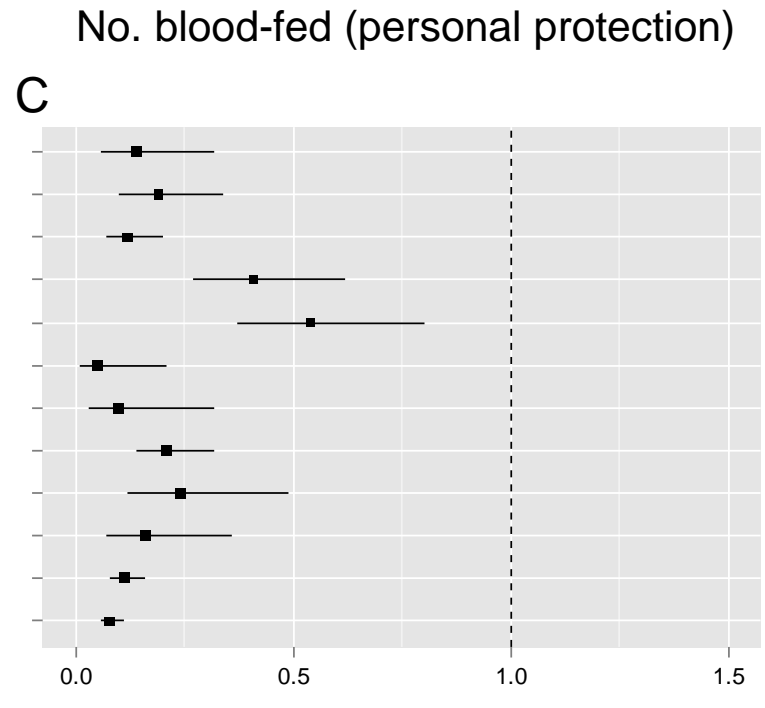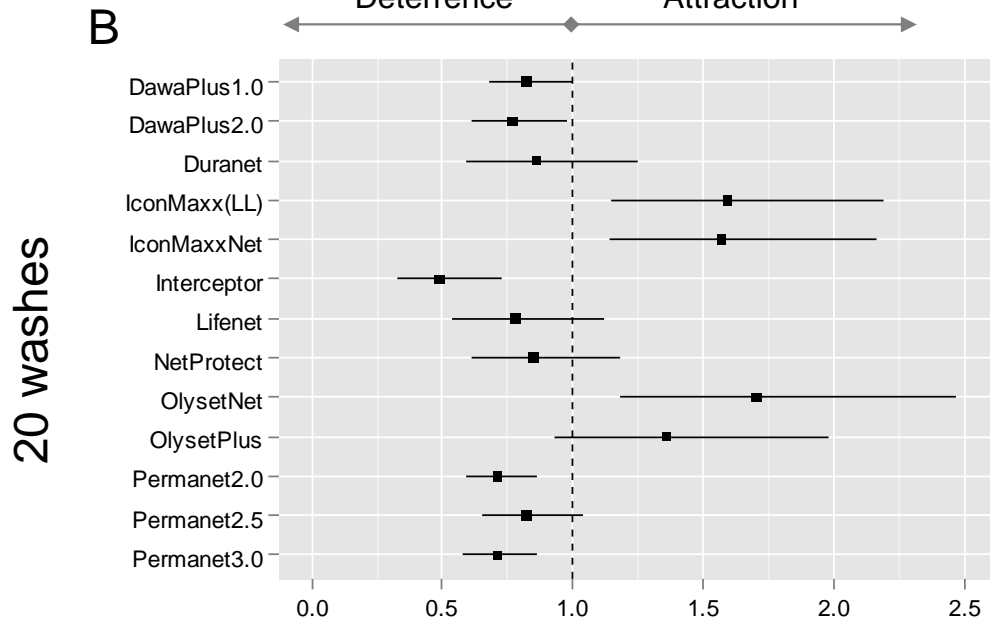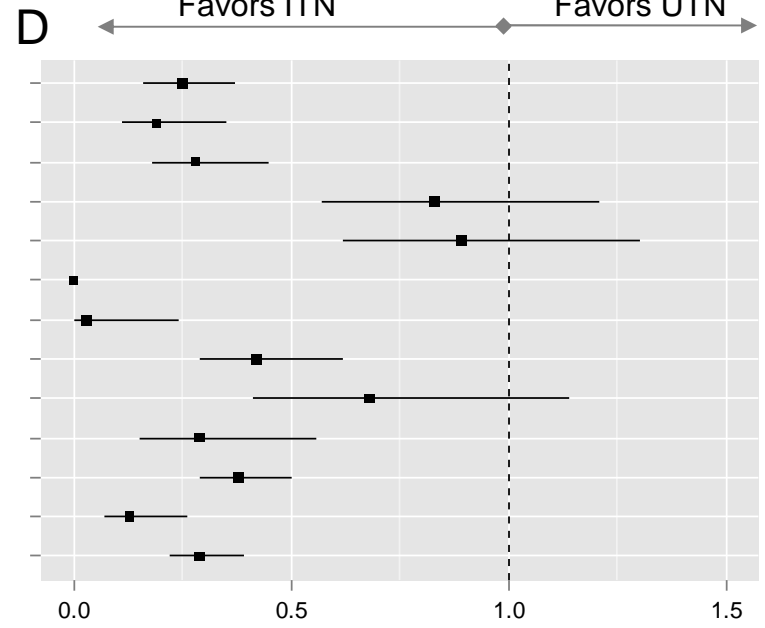

Rate Ratio (untreated net as the reference)
